# Supplementary material
Source: Springer Nature journal article supplement (https://www.springermedizin.de/resource/supplementary/12889_2011_4650_MOESM1_ESM.pdf/9493168)

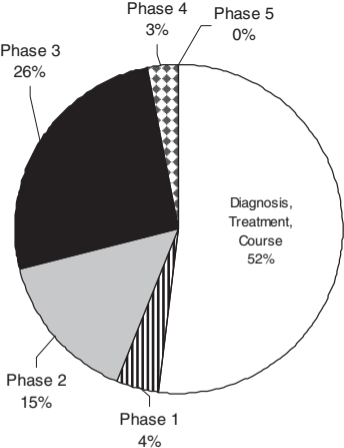

*International Journal of Eating Disorders*  
(N=701 articles)

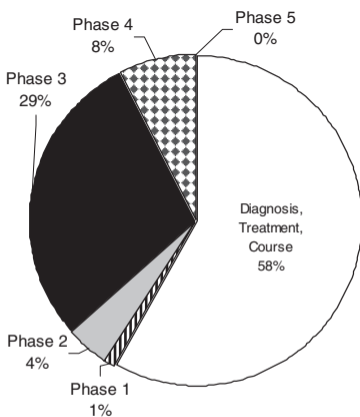

*Eating Disorders:  
The Journal of Treatment & Prevention*  
(N=280 articles)

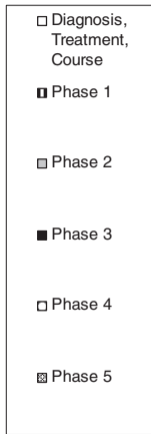

Supplement: MOESM1 [file 9493168]
